# Supplementary material
Source: Copernicus journal article supplement (doi:10.5194/nhess-26-2691-2026)
Supplement: Supplementary file 1 [file nhess-26-2691-2026-supplement.pdf]

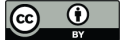

*Supplement of*

## **Consistency of seismic hazard estimates from a physics-based earthquake simulator: a case study in south-eastern Spain**

**Octavi Gómez-Novell et al.**

*Correspondence to:* Octavi Gómez-Novell (ogomez.novell@igme.es, octgomez@ub.edu)

The copyright of individual parts of the supplement might differ from the article licence.

**Table S1.** Macroseismic intensities recorded at the different cities considered in the study. Data is obtained from Instituto Geográfico Nacional database (IGN, 2025).

| Localities  | MI  | Year | Mw  |
|-------------|-----|------|-----|
| Lorca       | 7   | 1579 | 5.4 |
| Lorca       | 5.5 | 1674 | 4.6 |
| Lorca       | 8   | 1674 | 6   |
| Lorca       | 5.5 | 1783 | 4.6 |
| Lorca       | 6.5 | 1818 | 5.1 |
| Lorca       | 5   | 1829 | 6.6 |
| Lorca       | 3   | 1863 | 4.3 |
| Lorca       | 7   | 2011 | 5.1 |
| Vera        | 7.5 | 1406 | 5.7 |
| Vera        | 8.5 | 1518 | 6.2 |
| Vera        | 6   | 1863 | 4.3 |
| Vera        | 4   | 2011 | 5.1 |
| Murcia      | 7   | 1743 | 5.4 |
| Murcia      | 6.5 | 1746 | 5.1 |
| Murcia      | 5   | 1818 | 5.1 |
| Murcia      | 7   | 1829 | 6.6 |
| Murcia      | 4.5 | 1837 | 5.1 |
| Murcia      | 2.5 | 1863 | 4.3 |
| Murcia      | 5   | 1883 | 4.1 |
| Murcia      | 4   | 2011 | 5.1 |
| Almería     | 8   | 1487 | 6   |
| Almería     | 8.5 | 1522 | 6.5 |
| Almería     | 6   | 1550 | 4.9 |
| Almería     | 8   | 1658 | 6   |
| Almería     | 2   | 2011 | 5.1 |
| Torre Vieja | 6.5 | 1802 | 5.1 |
| Torre Vieja | 6.5 | 1823 | 5.1 |
| Torre Vieja | 7   | 1828 | 5.4 |
| Torre Vieja | 9.5 | 1829 | 6.6 |
| Torre Vieja | 5.5 | 1829 | 4.6 |
| Torre Vieja | 6.5 | 1829 | 5.1 |
| Torre Vieja | 5.5 | 1829 | 4.6 |
| Torre Vieja | 6.5 | 1837 | 5.1 |
| Torre Vieja | 5.5 | 1844 | 5.1 |
| Torre Vieja | 3   | 2011 | 5.1 |

**Table S2.** Coordinates and Vs30 values for the different cities and accelerometric stations used for the consistency analysis.

| Site / Station | Coordinates (lon, lat) | Vs30 (m/s) | Period activity | Vs30 Source                   |
|----------------|------------------------|------------|-----------------|-------------------------------|
| Lorca          | -1.7017, 37.67119      | 360        | N/A             | Herrero-Barbero et al. (2023) |
| Vera           | -1.869775, 37.247574   | 360        |                 |                               |
| Murcia         | -1.1285, 37.9843       | 150        |                 |                               |
| Almería        | -2.4641, 36.838        | 180        |                 |                               |
| Torre Vieja    | -0.683, 37.9777        | 180        |                 |                               |
| EXLO           | -1.7002, 37.6767       | 683.7      | 1989-2025       | Instituto Geográfico Nacional |
| EXNIJ          | -2.207, 36.9715        | 616.2      | 2002-2025       |                               |
| M04            | -1.1296, 37.9899       | 150        | 2008-2025       | Herrero-Barbero et al. (2023) |
| EXTO           | -0.6894, 37.9917       | 726        | 1993-2025       | Instituto Geográfico Nacional |
| EXVE2          | -1.8705, 37.2522       | 316.3      | 2012-2025       |                               |

**Table S3.** PGA records of the Mw 5.1 2011 Lorca earthquake at the different accelerometric stations where it was recorded. Data is obtained from Instituto Geográfico Nacional database (IGN, 2025).

| Event   | Date       | MI  | Mw  | Epicentre | Station | PGA (mg) N-S | PGA (mg) E-W | Mean PGA (g) |
|---------|------------|-----|-----|-----------|---------|--------------|--------------|--------------|
| 1060340 | 11/05/2011 | VII | 5.1 | NE LORCA  | EXLO    | 360.4        | 150.8        | 0.2556       |
| 1060340 | 11/05/2011 | VII | 5.1 | NE LORCA  | EXVE2   | 5.94         | 7.13         | 0.006535     |
| 1060340 | 11/05/2011 | VII | 5.1 | NE LORCA  | M04     | 7.17         | 8.46         | 0.007815     |

### Cat-21

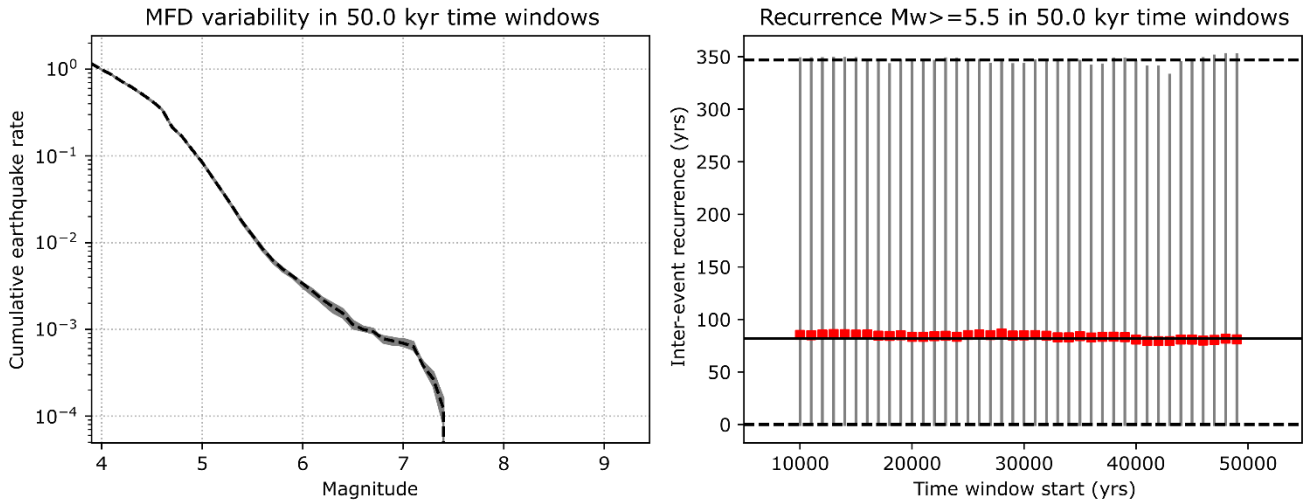

### Cat-18

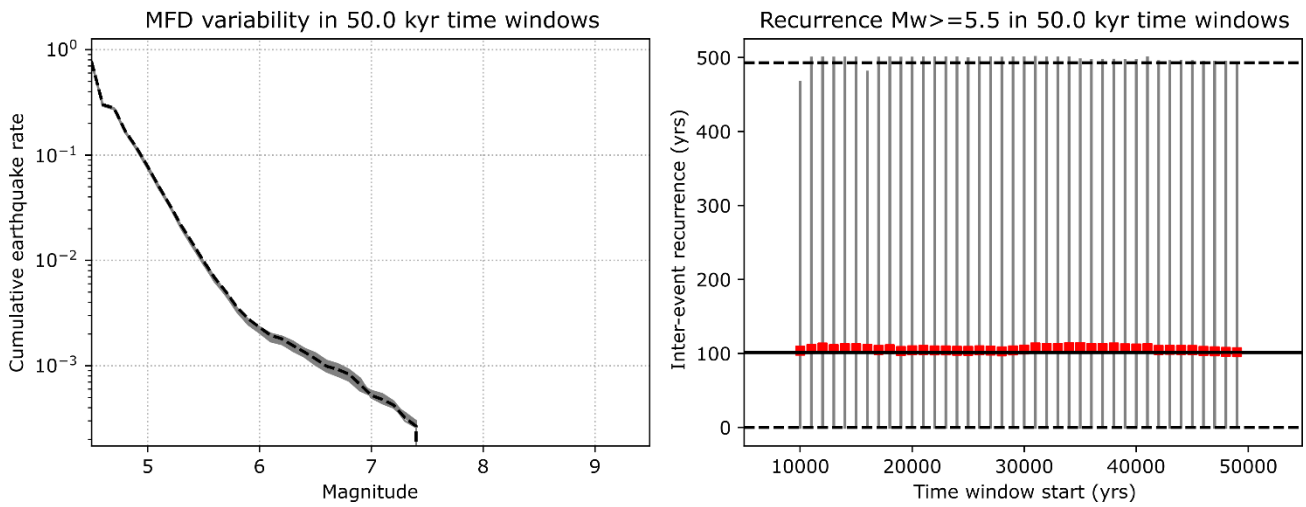

**Figure S1. (Left)** Magnitude-frequency distributions of 50 kyr long sub-catalogues (grey lines) moved across the full 100 kyr long simulated catalogue (black dashed line) in 1 kyr long time steps for Cat-21 and Cat-18. **(Right)** Average inter-event recurrences for  $M_w \geq 5.5$  earthquakes of the 50 kyr long sub-catalogues (red squares) and their respective 2.5-97.5% percentile ranges (grey lines), plotted against the average inter-event recurrence and interquartile range of the full 100 kyr simulated catalogue (black solid and dashed lines, respectively).

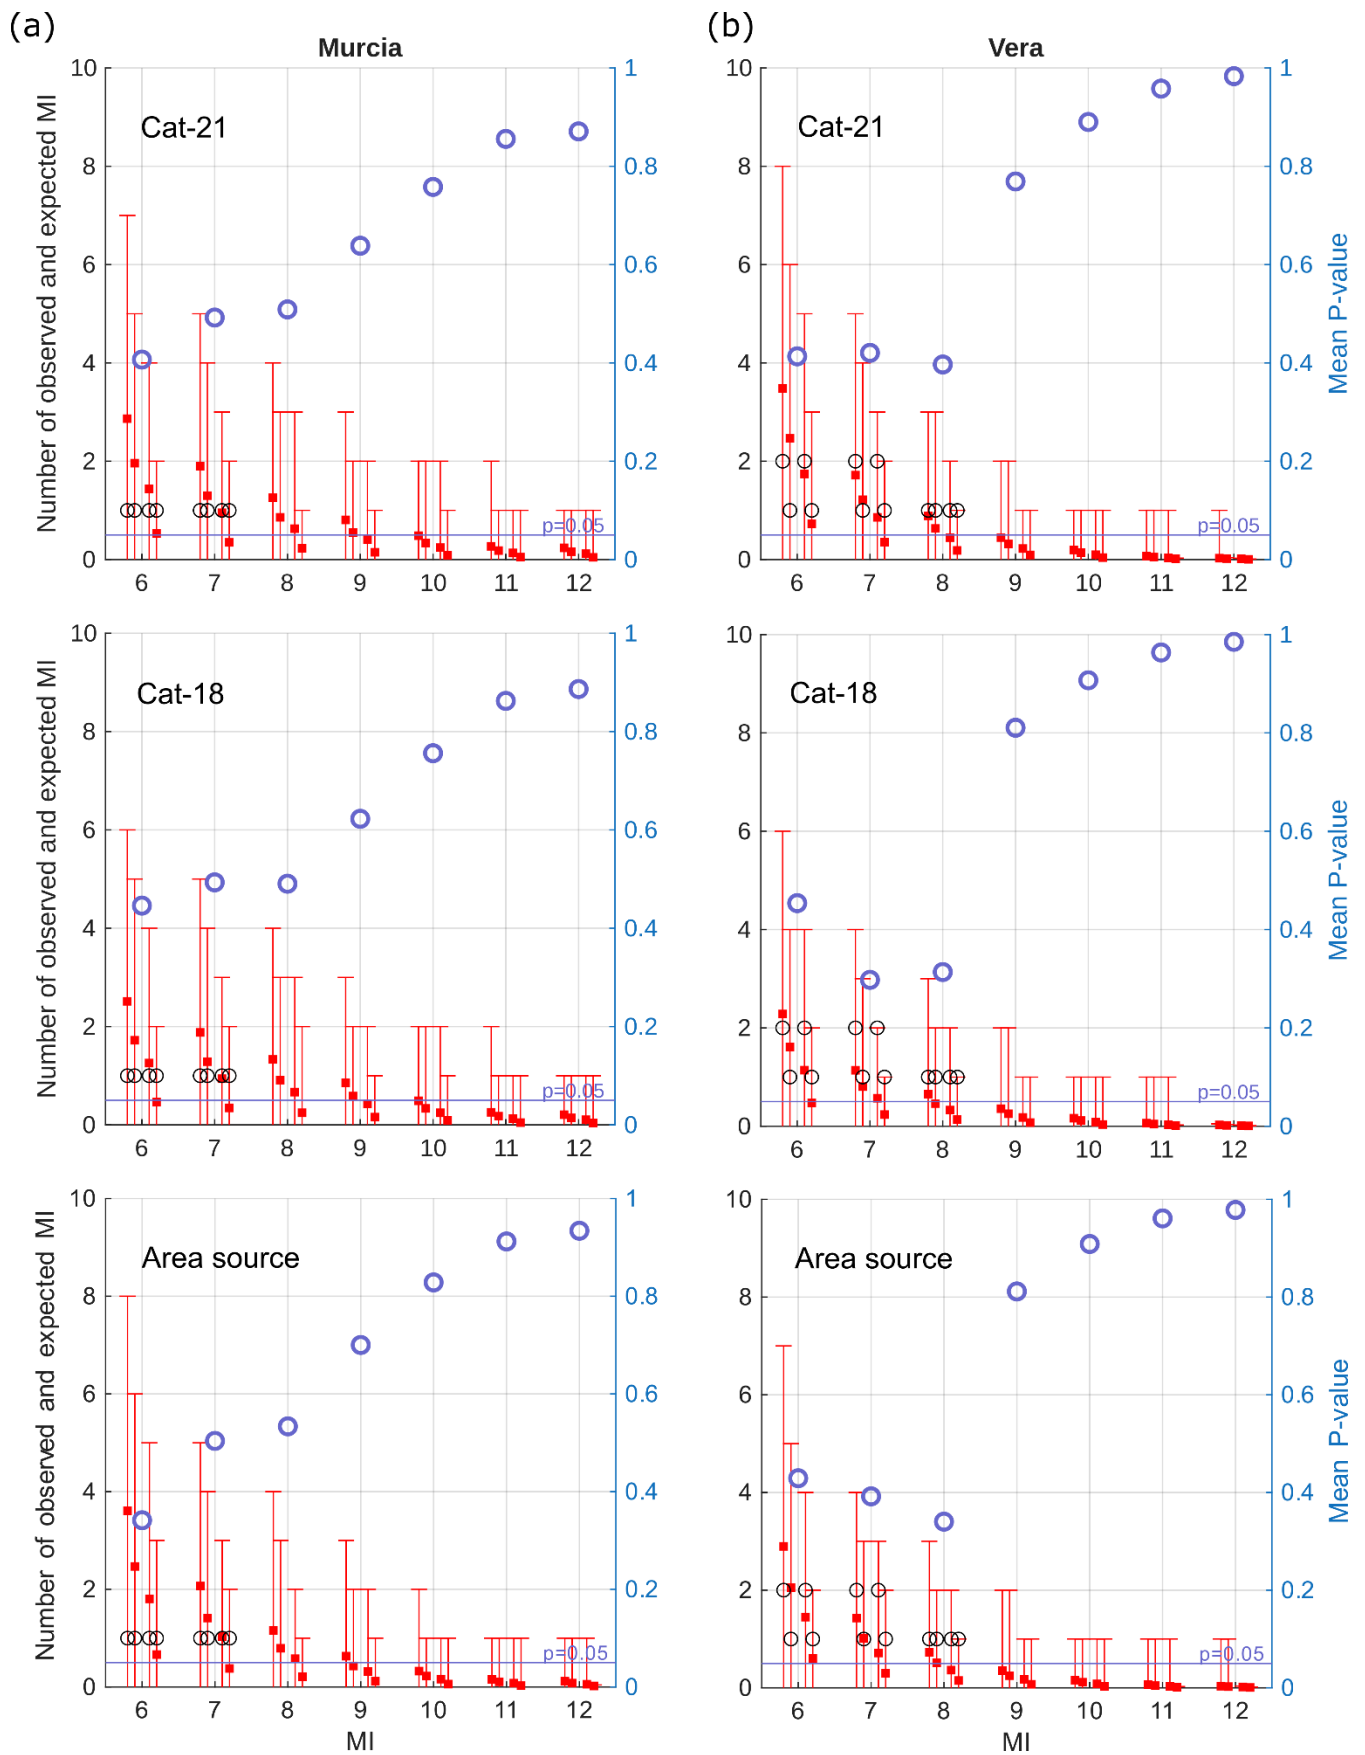

(continues in the next page)

(continues from previous page)

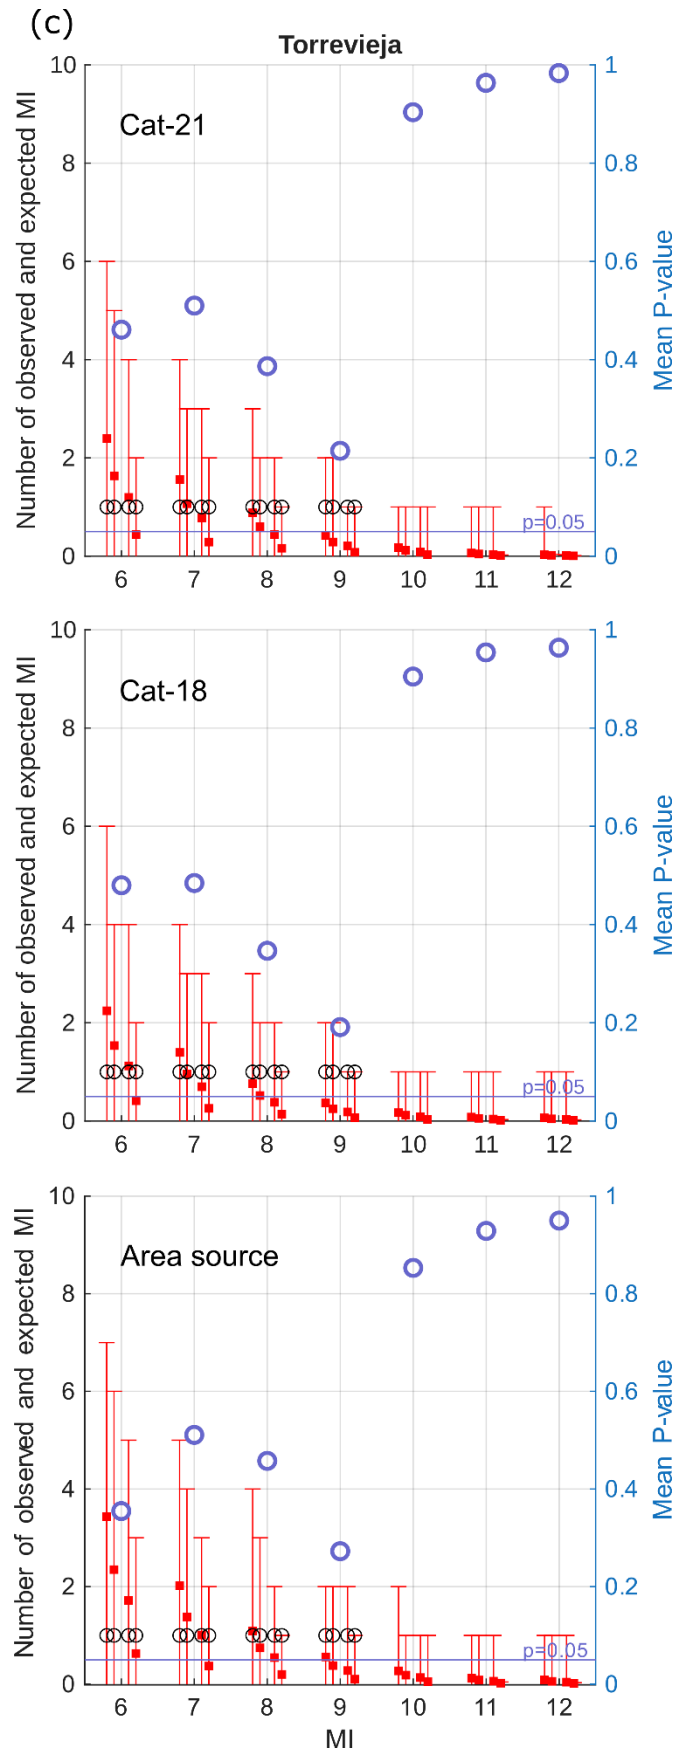

**Figure S2.** Same as figure 8 of the paper but for the rest of the city locations (Murcia, Vera and Torreveija).

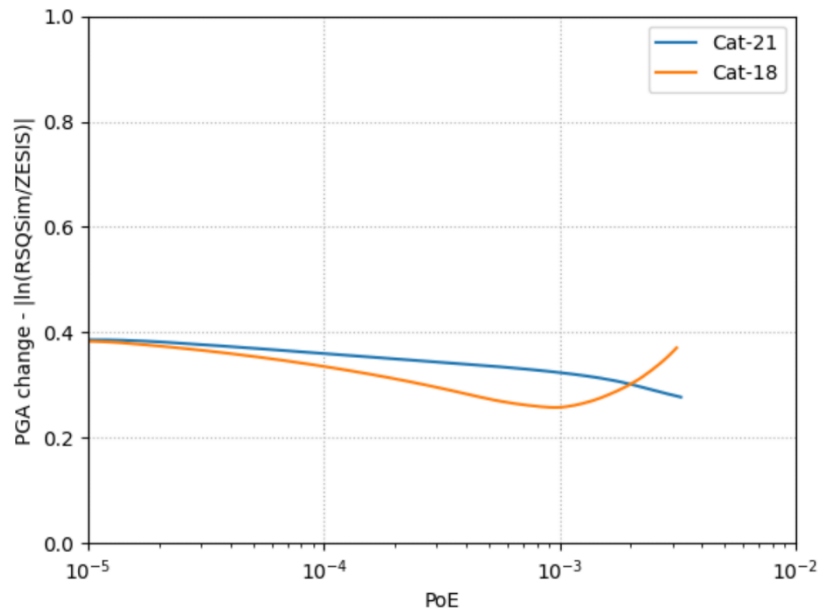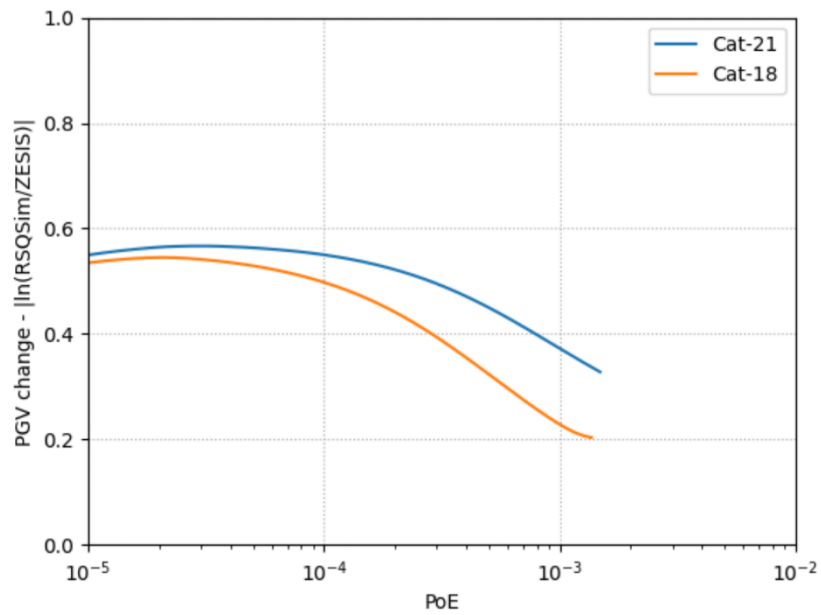

**Figure S3.** PGA (top) and PGV (bottom) variation of the probabilities of exceedance of Cat-21 and Cat-18 with respect to the ZESIS area source model. Changes are computed using  $\langle |\ln(\text{RSQSim-ZESIS})| \rangle$ .

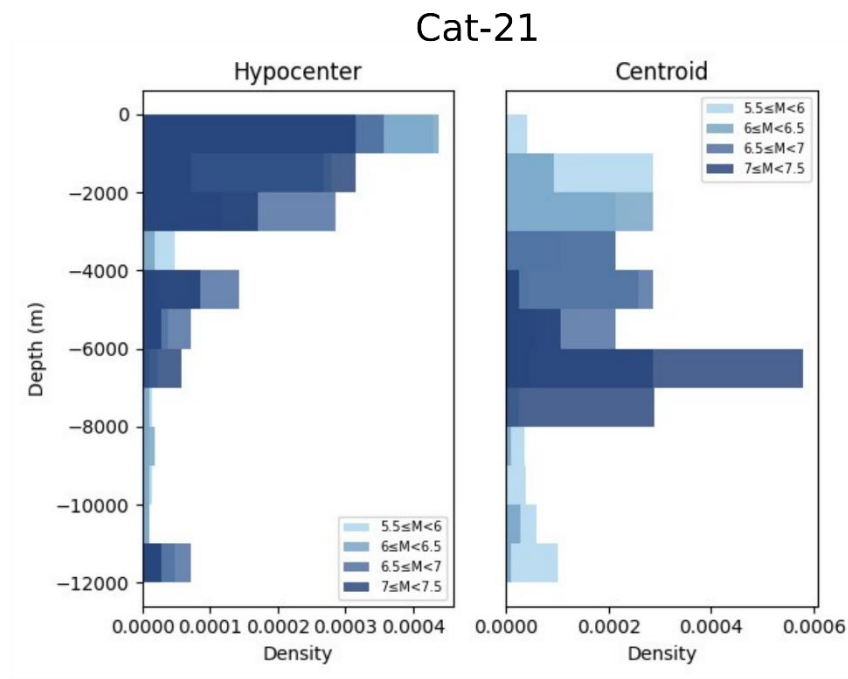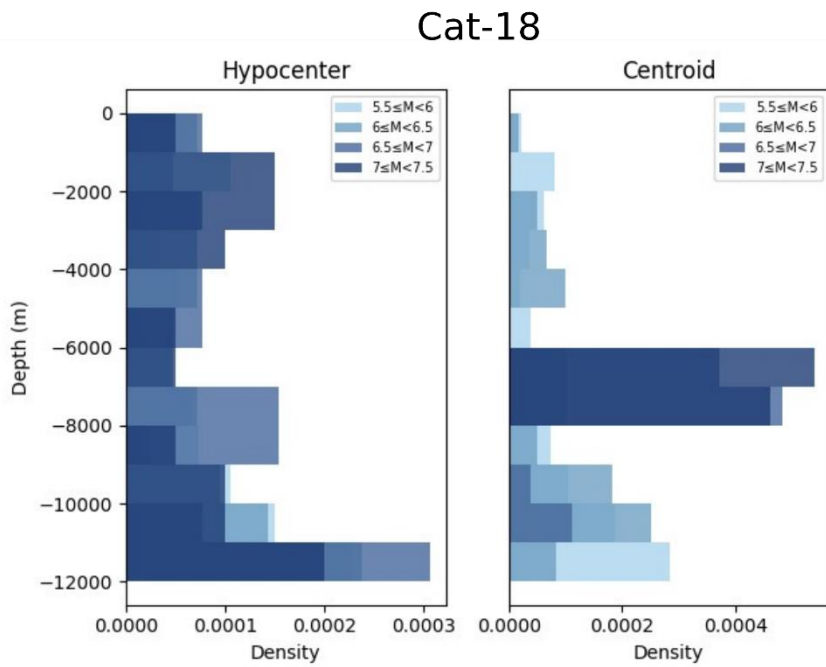

**Figure S4.** Depth distribution of hypocenters (left column) and rupture centroids (right column) for simulated catalogues Cat-21 and Cat-18.

## Cat-21

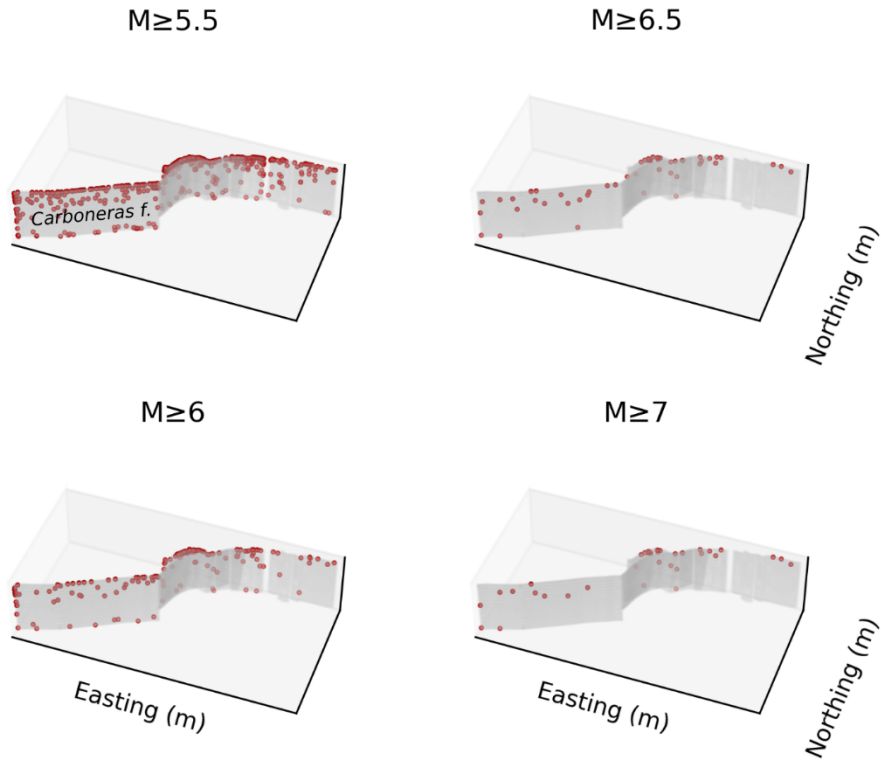

## Cat-18

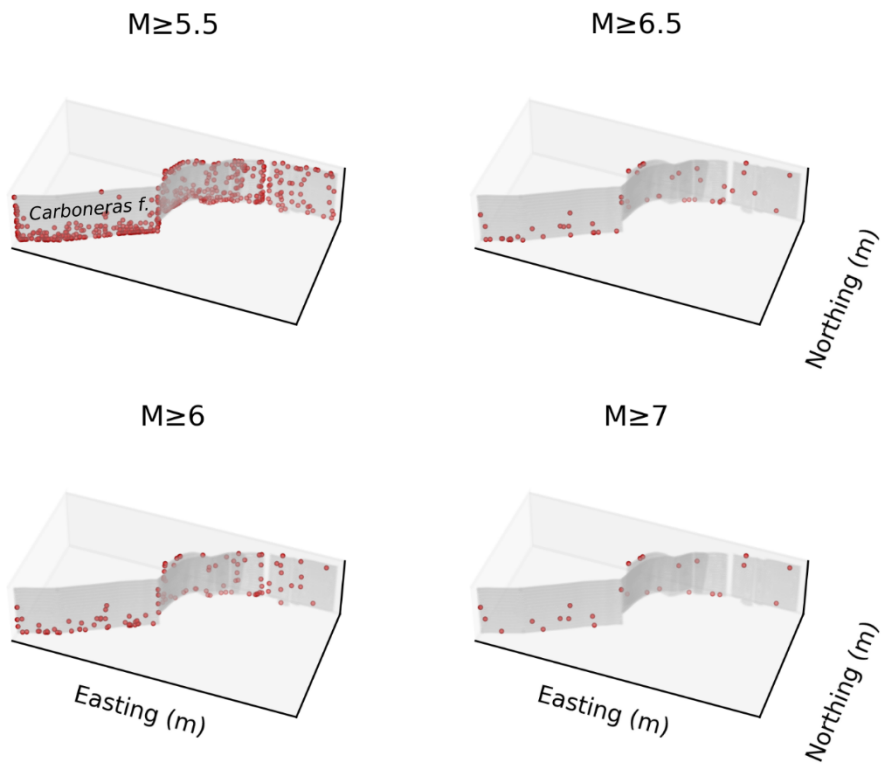

**Figure S5.** Distribution of hypocenters for simulated catalogues Cat-21 and Cat-18 along the EBSZ faults. The Carboneras fault is indicated for reference.

## Cat-21

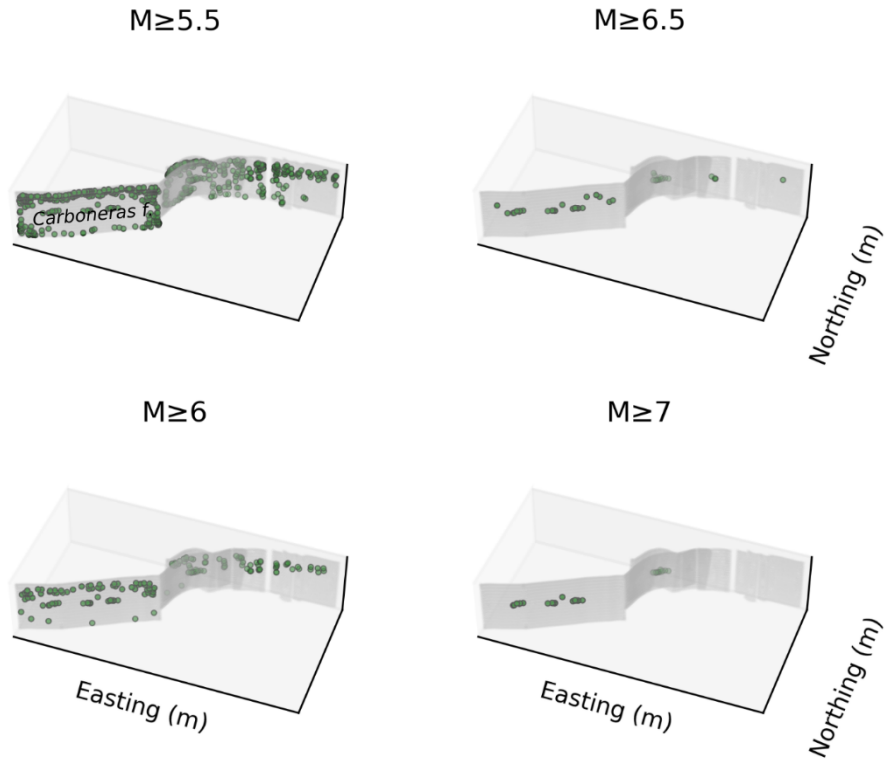

## Cat-18

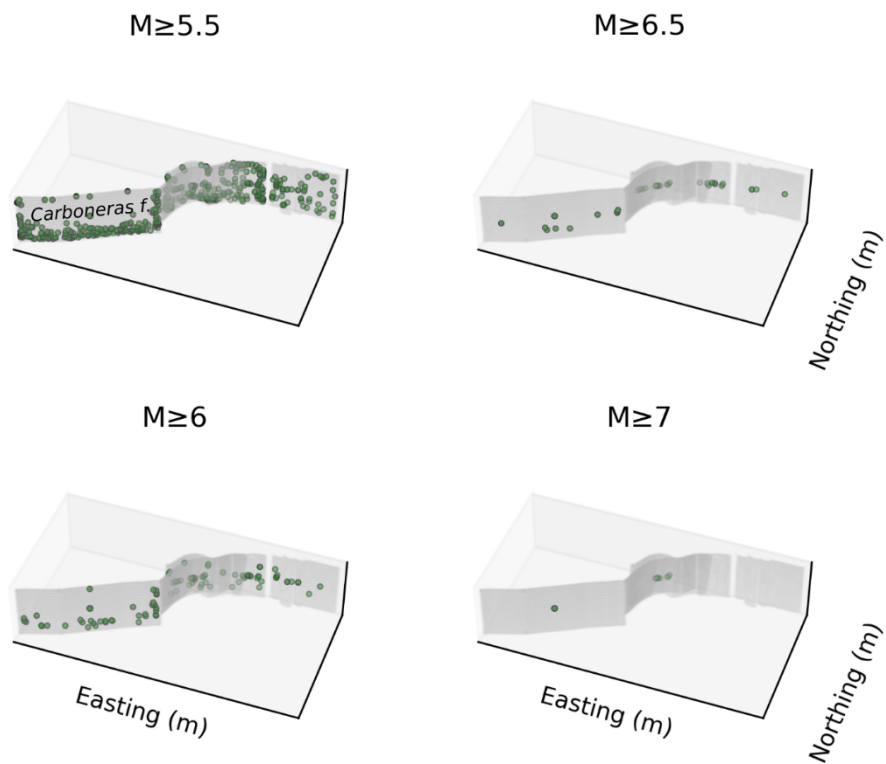

**Figure S6.** Distribution of rupture centroids for simulated catalogues Cat-21 and Cat-18 along the EBSZ faults. The Carboneras fault is indicated for reference.

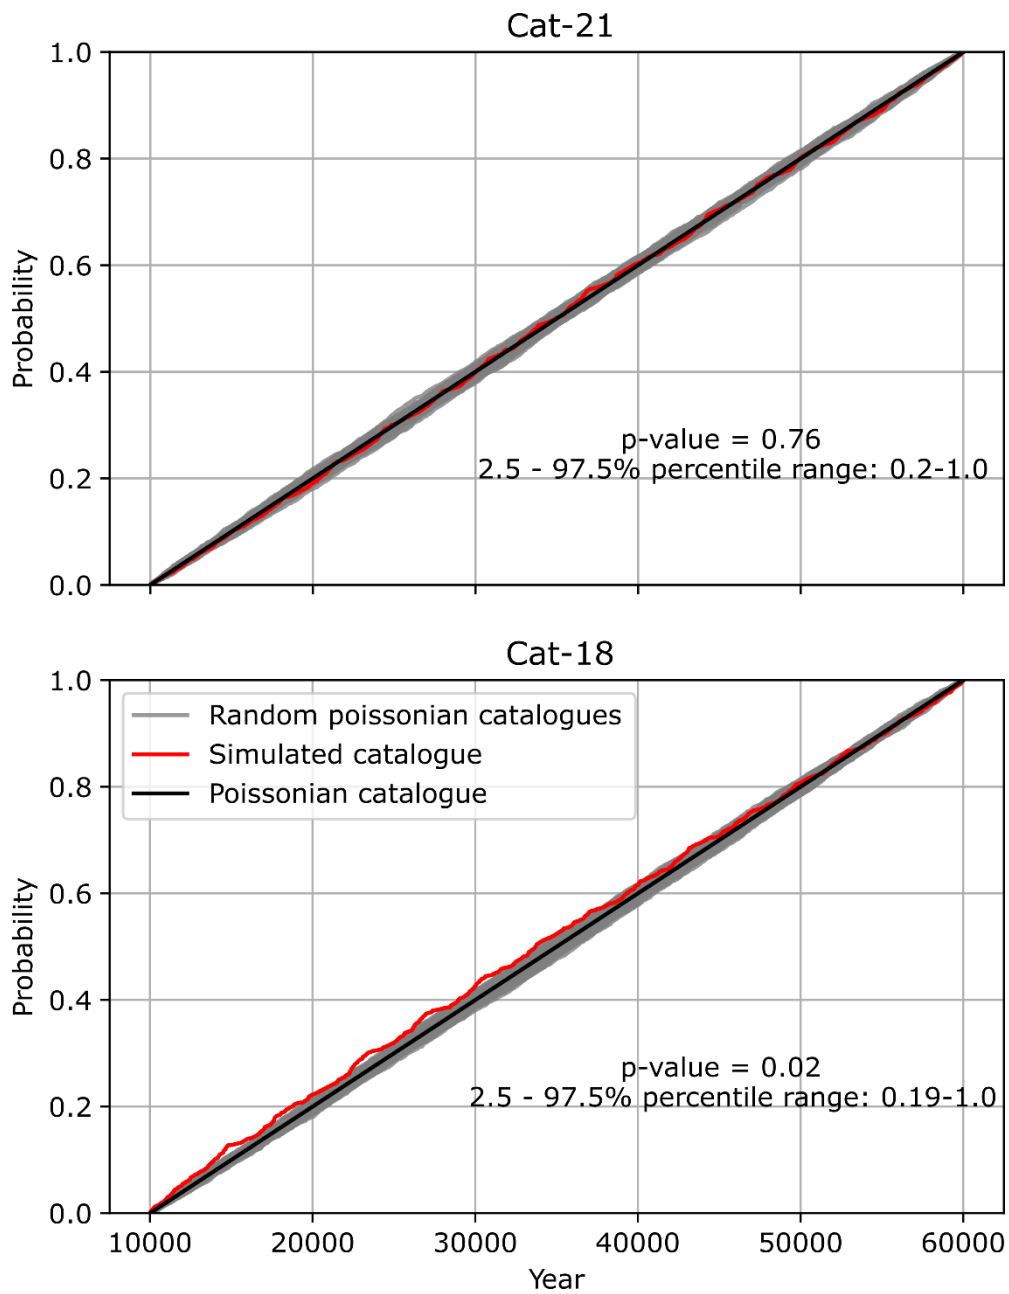

**Figure S7.** Kolmogorov–Smirnov (KS) test results for the temporal distribution of simulated ruptures in the Cat-21 (top) and Cat-18 (bottom) catalogues considering all ruptures of magnitude equal or above Mw 5.

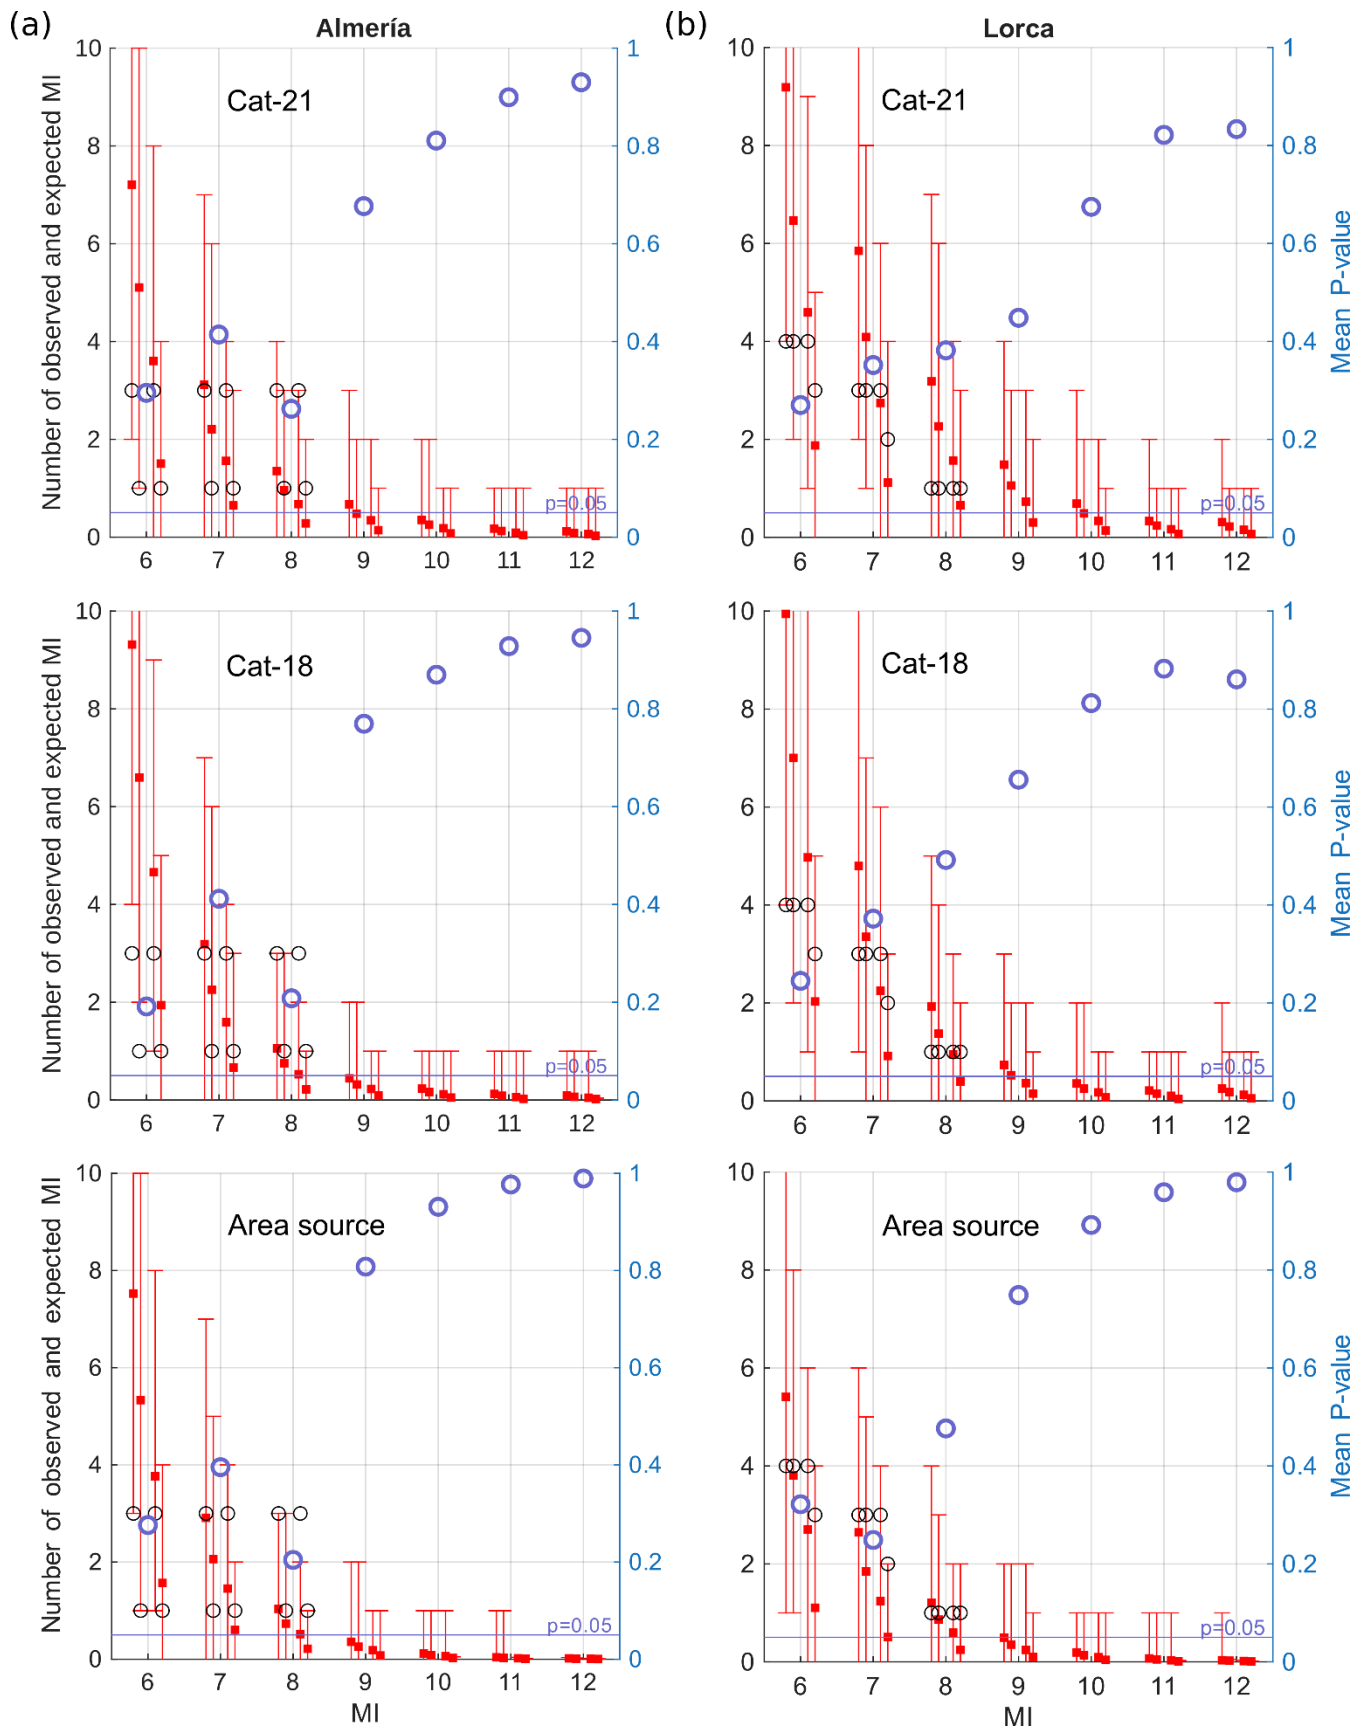

(continues in the next page)

(continues from previous page)

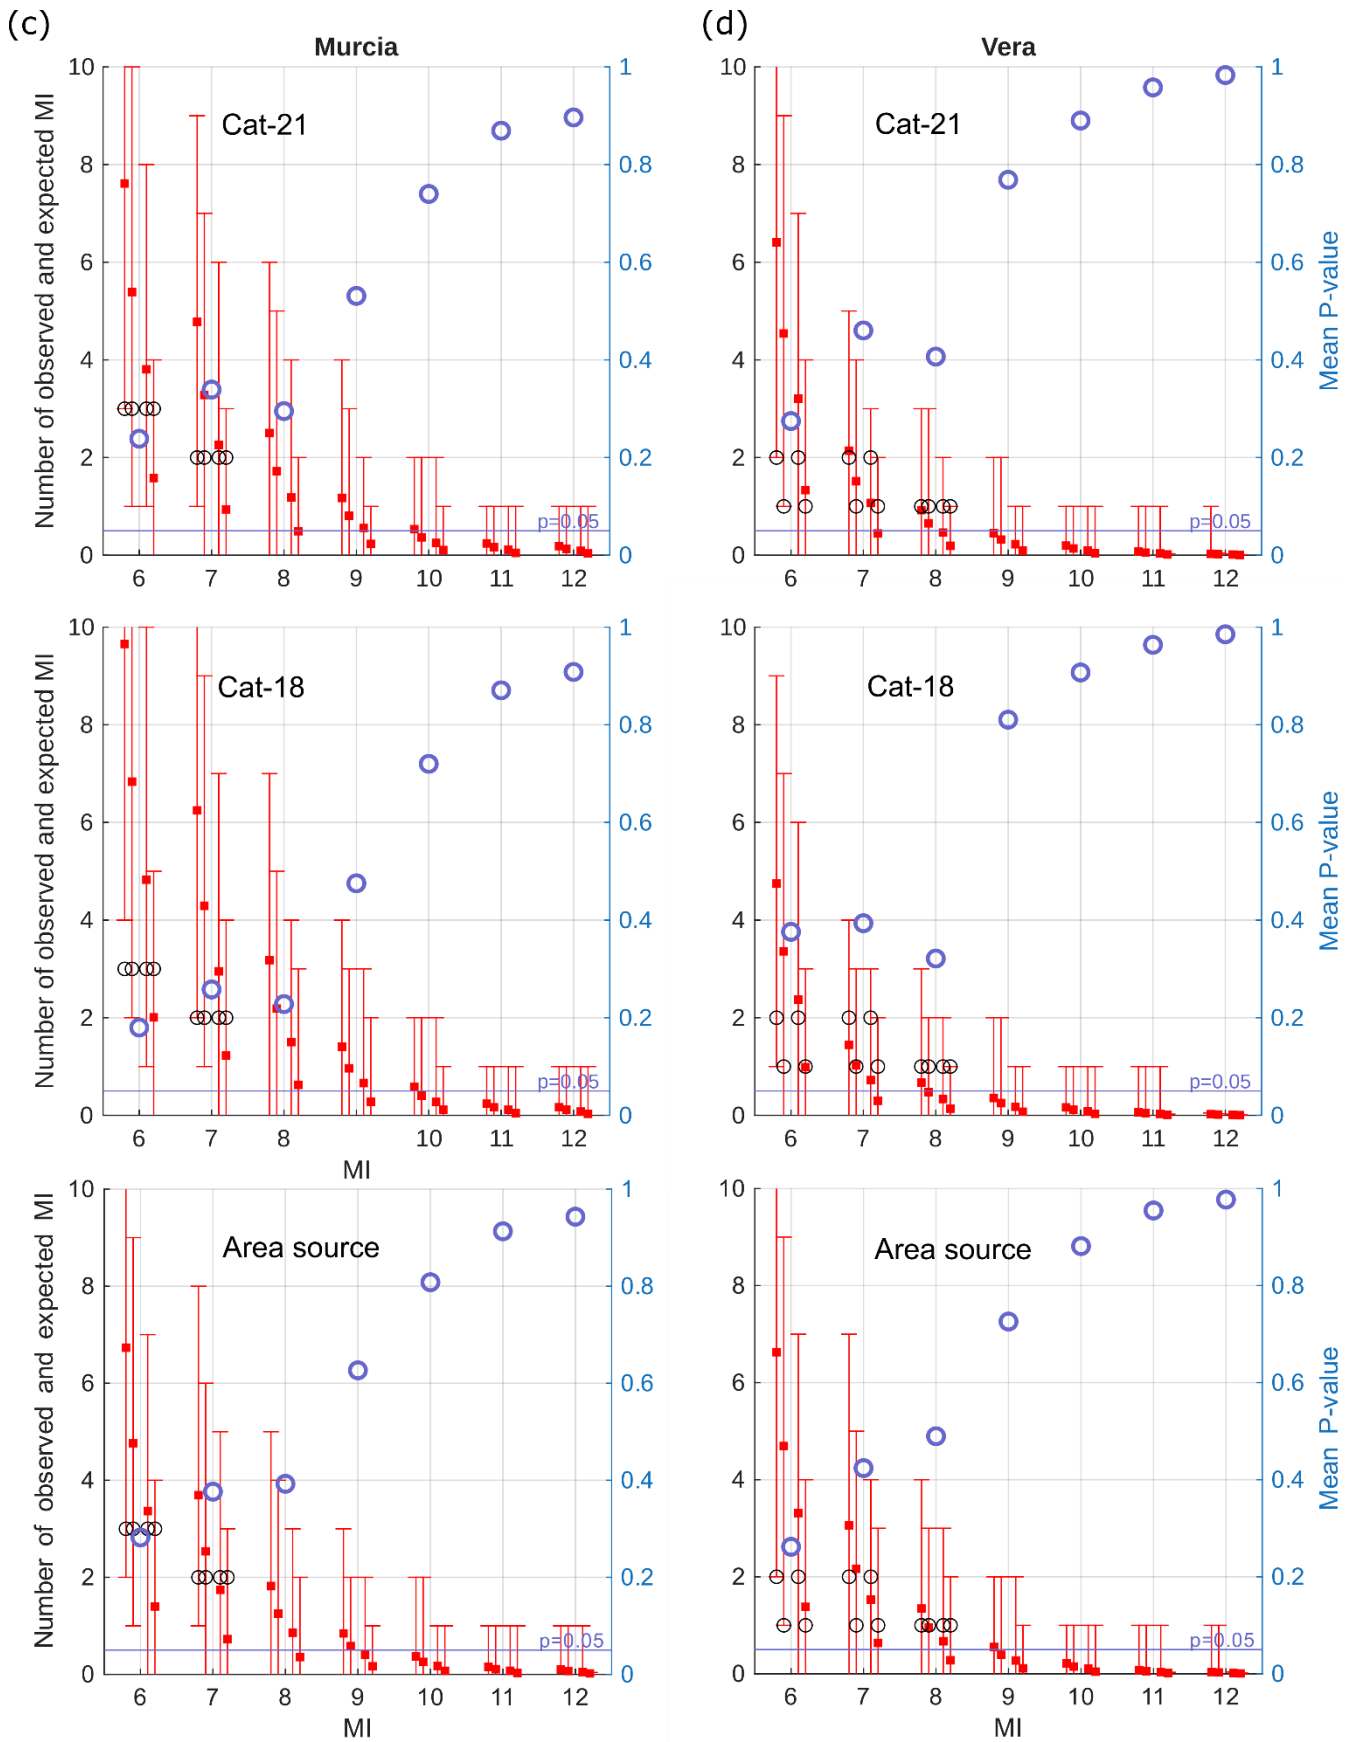

(continues in the next page)

(continues from previous page)

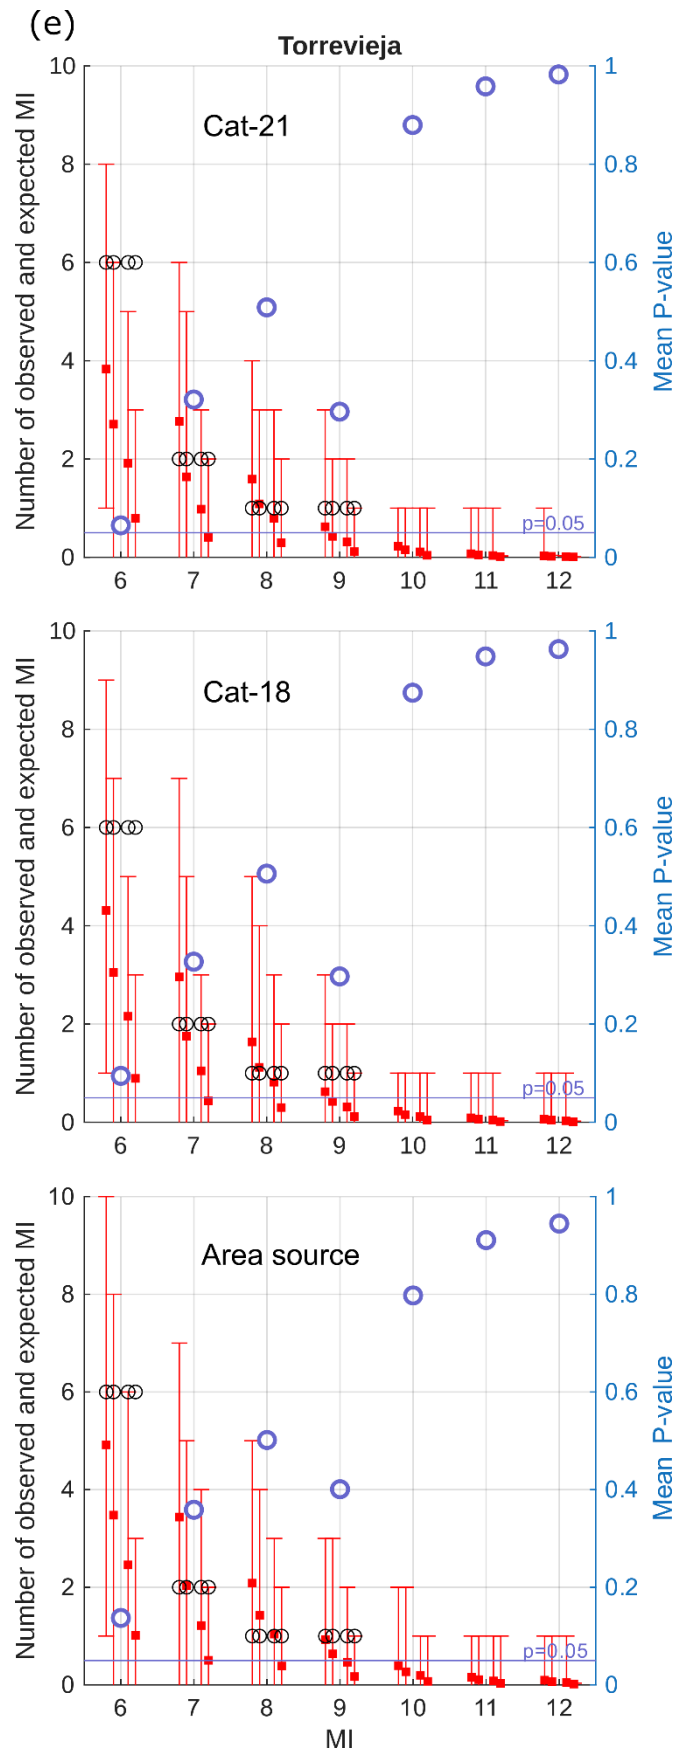

**Figure S8.** Same as figure S2 but considering observations and forecasts for magnitudes above or equal to Mw 5 and for all five city localities in the study.

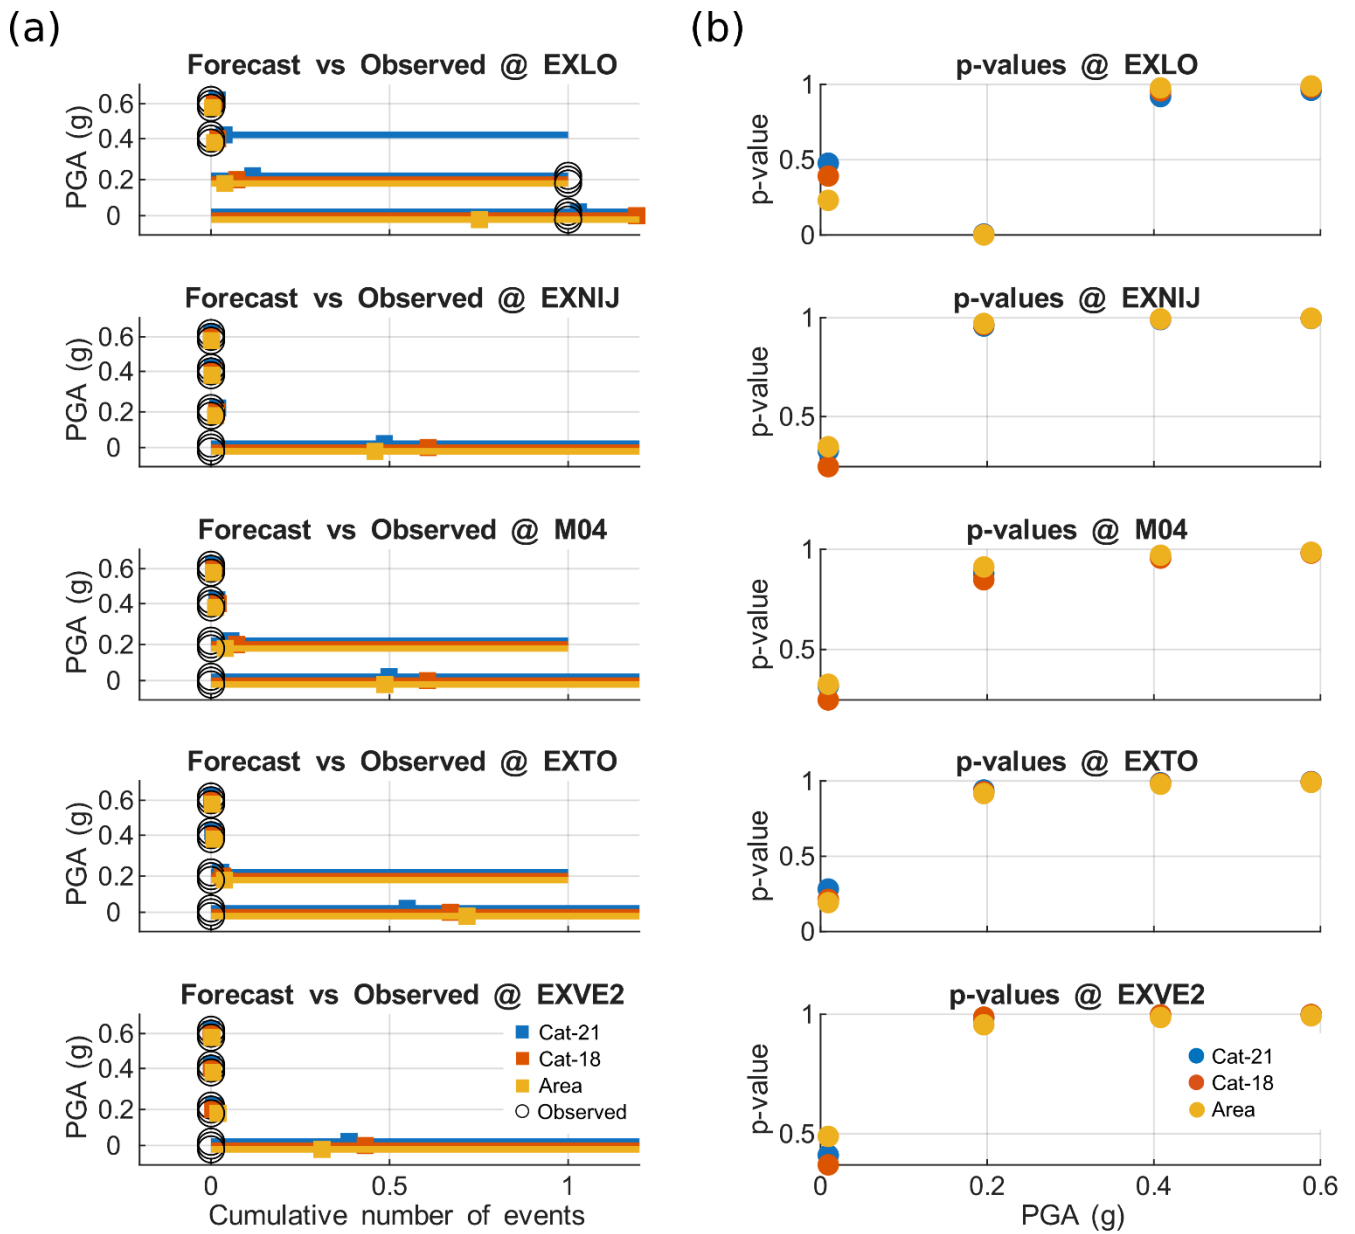

**Figure S9.** Same as figure 9 of the article but considering observations and forecast for magnitudes equal or above Mw 5 at the different accelerometric stations of the study.

|              |        | Macroseismic intensity |        |        |
|--------------|--------|------------------------|--------|--------|
| Site         | Model  | MI 6                   | MI 7   | MI 8   |
| Lorca        | Cat-21 | -1.309                 | -1.045 | -0.963 |
|              | Cat-18 | -1.406                 | -0.988 | -0.709 |
|              | Area   | -1.134                 | -1.391 | -0.741 |
| Vera         | Cat-21 | -1.292                 | -0.776 | -0.900 |
|              | Cat-18 | -0.978                 | -0.933 | -1.136 |
|              | Area   | -1.340                 | -0.858 | -0.714 |
| Murcia       | Cat-21 | -1.433                 | -1.081 | -1.221 |
|              | Cat-18 | -1.715                 | -1.355 | -1.479 |
|              | Area   | -1.265                 | -0.977 | -0.935 |
| Almería      | Cat-21 | -1.221                 | -0.881 | -1.338 |
|              | Cat-18 | -1.653                 | -0.888 | -1.570 |
|              | Area   | -1.287                 | -0.928 | -1.588 |
| Torre vieja  | Cat-21 | -2.734                 | -1.136 | -0.676 |
|              | Cat-18 | -2.358                 | -1.118 | -0.681 |
|              | Area   | -1.987                 | -1.025 | -0.690 |
|              |        | PGA                    |        |        |
| Station      | Model  | 0.2g                   | 0.4g   | 0.6g   |
| EXLO         | Cat-21 | -2.209                 | -0.036 | -0.017 |
|              | Cat-18 | -2.662                 | -0.019 | -0.009 |
|              | Area   | -3.273                 | -0.010 | -0.004 |
| EXNIJ        | Cat-21 | -0.019                 | -0.004 | -0.002 |
|              | Cat-18 | -0.016                 | -0.003 | -0.001 |
|              | Area   | -0.013                 | -0.003 | -0.001 |
| M04          | Cat-21 | -0.056                 | -0.016 | -0.007 |
|              | Cat-18 | -0.071                 | -0.019 | -0.008 |
|              | Area   | -0.040                 | -0.013 | -0.006 |
| EXTO         | Cat-21 | -0.027                 | -0.005 | -0.002 |
|              | Cat-18 | -0.032                 | -0.007 | -0.003 |
|              | Area   | -0.038                 | -0.009 | -0.004 |
| EXVE2        | Cat-21 | -0.007                 | -0.001 | -0.000 |
|              | Cat-18 | -0.005                 | -0.001 | -0.000 |
|              | Area   | -0.019                 | -0.006 | -0.003 |
| <b>TOTAL</b> | Cat-21 | <b>-20.415</b>         |        |        |
|              | Cat-18 | <b>-21.825</b>         |        |        |
|              | Area   | <b>-20.302</b>         |        |        |

**Figure S10.** *LogP* scores obtained for the three tested hazard models, Cat-21, Cat-18, and the area source model, across five localities and five instrumental stations, and for all magnitudes equal or above to Mw 5. With green background, we mark the best model for each situation.

## References

Herrero-Barbero, P., Álvarez-Gómez, J. A., Tsige, M., Martínez-Díaz, J. J.: Deterministic seismic hazard analysis from physics-based earthquake simulations in the Eastern Betics (SE Iberia), *Engineering Geology*, 327, 107364 <https://doi.org/10.1016/j.enggeo.2023.107364>, 2023.

Instituto Geográfico Nacional (IGN): Seismic Alert Network Stations, [data set], <https://www.ign.es/web/ca/ign/portal/sis-area-sismicidad>, 2025.
